# Supplementary material for: Achieving near-Pt hydrogen production on defect nanocarbonviathe synergy between carbon defects and heteroatoms
Source: Royal Society of Chemistry journal article supplement (doi:10.1039/d2cc06895h), 2023-01-01
Supplement: d2cc06895h1.pdf [file d2cc06895h1.pdf]

Electronic Supplementary Information

**Achieving near-Pt hydrogen production on defect nanocarbon via the synergy between  
carbon defects and heteroatoms**

*Hao Wu*<sup>\*a</sup> and *Yuting luan*<sup>b</sup>

<sup>a</sup>Key Laboratory of Functional Inorganic Material Chemistry (Ministry of Education of China),  
School of Chemistry and Materials Science, Heilongjiang University, 74# Xuefu Road,  
Nangang District, Harbin 150080, People's Republic of China;

<sup>b</sup>School of Food Engineering, Harbin University, 109# Zhongxing Avenue, Nangang District,  
Harbin 150080, People's Republic of China.

\*Corresponding author E-mail: [haowu@hlju.edu.cn](mailto:haowu@hlju.edu.cn).

## Table of contents

|                                       |           |
|---------------------------------------|-----------|
| <b>1. Experimental Section .....</b>  | <b>3</b>  |
| <b>2. Supplementary Figures .....</b> | <b>9</b>  |
| <i>Fig. S1</i> .....                  | 9         |
| <i>Fig. S2</i> .....                  | 10        |
| <i>Fig. S3</i> .....                  | 10        |
| <i>Fig. S4</i> .....                  | 11        |
| <i>Fig. S5</i> .....                  | 11        |
| <i>Fig. S6</i> .....                  | 12        |
| <i>Fig. S7</i> .....                  | 12        |
| <i>Fig. S8</i> .....                  | 13        |
| <i>Fig. S9</i> .....                  | 13        |
| <i>Fig. S10</i> .....                 | 14        |
| <i>Fig. S11</i> .....                 | 14        |
| <i>Fig. S12</i> .....                 | 15        |
| <i>Fig. S13</i> .....                 | 16        |
| <i>Fig. S14</i> .....                 | 16        |
| <i>Fig. S15</i> .....                 | 17        |
| <i>Fig. S16</i> .....                 | 18        |
| <i>Fig. S17</i> .....                 | 19        |
| <i>Fig. S18</i> .....                 | 20        |
| <i>Fig. S19</i> .....                 | 21        |
| <i>Fig. S20</i> .....                 | 22        |
| <i>Fig. S21</i> .....                 | 23        |
| <b>3. Supplementary Tables .....</b>  | <b>24</b> |
| <i>Table S1</i> .....                 | 24        |
| <i>Table S2</i> .....                 | 25        |
| <i>Table S3</i> .....                 | 26        |
| <i>Table S4</i> .....                 | 27        |
| <i>Table S5</i> .....                 | 28        |
| <i>Table S6</i> .....                 | 32        |
| <i>Table S7</i> .....                 | 33        |
| <i>Table S8</i> .....                 | 34        |

## 1. Experimental Section

### 1.1 Reagents

Multi-walled carbon nanotube (CNT, purity > 95 %, 10-30  $\mu\text{m}$  in length, 10-30 nm in diameter) was purchased from Chengdu Organic Chemicals Co., Ltd and, before use, CNT was acidified<sup>S1</sup> and soaked in 6.0 M HCl, which was renewed every five days, for at least a month in order to completely remove metal impurities. Carbon fiber (CF, purity > 99 %, 10-20  $\mu\text{m}$  in length, 150-200 nm in diameter) was received from Showa Denko and, before use, CF was pre-treated using the same procedure as used for the CNT. Flake graphite was obtained from Nanjing XFNANO Materials Tech Co., Ltd and graphene oxide (GO) was prepared using a modified Hummers' method reported in the literature (the mass ratio of graphite and  $\text{KMnO}_4$  was 1 : 3).<sup>S2</sup> Melamine (99.5 % purity) and phosphoric acid (85 wt.%) were purchased from Tianjin Guangfu Fine Chemical Research Institute and Tianli Chemical Reagent Co., Ltd., respectively. Commercial Pt/C (20 % Pt on Vulcan XC-72) and Nafion 117 solution (5 % (w/w) in low aliphatic alcohols and water) were obtained from Johnson Matthey Fuel Cells and Sigma-Aldrich LLC, respectively. Ultra-pure water (18.2  $\Omega\text{m}$ ) used throughout all experiments was received from a Milli-Q Water System (Millipore Corp., Bedford, MA, USA). All the other reagents were of analytical grade and used without further purification in this work.

### References:

- S1. H. Wu, Z. M. Chen, J. L. Zhang, F. Wu, C. Y. He, B. Wang, Y. Q. Wu and Z. Y. Ren, *J. Mater. Chem. A.*, 2016, 4, 1096-1104.
- S2. J. T. Zhang, L. T. Qu, G. Q. Shi, J. Y. Liu, J. F. Chen and L. M. Dai, *Angew. Chem. Int. Ed.*, 2016, 55, 2230-2234.

### 1.2 Preparation of CNT-NP

CNT-NP was prepared by the pyrolysis of H-bonding driven melamine-phosphoric acid/CNT (CNT@MP) assemblies. Briefly, 40 mg of CNT was sonicated in 100 mL of ultra-pure water at room temperature for 2 h. Subsequently, a certain amount of melamine and phosphoric acid were added under vigorous stirring. Next, the mixture was continuously stirred for 2 h in water bath at 90  $^{\circ}\text{C}$ . After natural cooling to room temperature, the product was filtered and washed with ultra-pure water, methanol, and ether until the filtrate was colorless, then dried in a vacuum oven for 2 h at 80  $^{\circ}\text{C}$ , affording the CNT@MP assemblies as brownish black powders. Finally,

the assemblies were calcined at 900 °C for 2 h in N<sub>2</sub> atmosphere with a ramp rate of 5 °C min<sup>-1</sup>. After the furnace was naturally cooled down to room temperature under a flowing N<sub>2</sub> atmosphere, the desired CNT-NP was obtained. The detailed dosages of melamine and phosphoric acid in the synthesis of CNT-NP with different proportion and content of N and P were listed in **Table S7**.

As a control, N doped CNT (CNT-N) was prepared by thermal-treating the mixture of CNT (40 mg) and melamine (100 mg) at 900 °C for 2 h in N<sub>2</sub> atmosphere with a ramp rate of 5 °C min<sup>-1</sup>. P doped CNT (CNT-P) was prepared using the same procedure as used for CNT-N except that melamine was replaced with triphenylphosphine (400 mg). N, P co-doped carbon fiber (CF-NP) and N, P co-doped graphene (G-NP) were prepared using the same procedure as used for CNT-NP, and the detailed dosages of melamine and phosphoric acid were listed in **Table S8**.

### **1.3 Preparation of CNT-VP**

CNT-VP was obtained from CNT-NP by a tenderly electrochemical etching. Briefly, 1 mg of CNT-NP was dispersed in the 0.2 mL ethanol/5 wt.% Nafion (200 μL/10 μL) solution for at least 20 min of ultrasonication. A 20 μL amount of this catalyst ink was dropped onto a well-polished glassy carbon electrode (GCE) surface (4 mm in diameter). Then, the GCE was undergone an electrochemical etching by a continuous cyclic voltammetry (CV) from – 0.1 and – 1.0 V (vs. RHE) with a saturated calomel electrode (SCE) as the reference electrode and a graphite rod as the counter electrode in 0.5 M H<sub>2</sub>SO<sub>4</sub> (scan rate: 2 mV s<sup>-1</sup>). After 1000 cycles, the product was separated from GCE surface, washed with ultra-pure water and methanol, and then lyophilized, affording CNT-VP as black powders.

As a control, vacancy doped CNT (CNT-V) was prepared using the same procedure as used for CNT-VP except that CNT-NP was replaced with CNT-N. CF-VP and G-VP were prepared using the same procedure as used for CNT-VP except that CNT-NP was replaced with CF-NP or G-NP.

### **1.4 Characterization**

Transmission electron microscopy (TEM) images and the scanning TEM-energy-dispersive X-ray spectroscopy (STEM-EDS) mapping were acquired on a Tecnai G2 F20 electron microscope (FEI, USA) with an acceleration voltage of 200 kV. X-ray diffraction (XRD)

patterns were performed on a 40 kV D/max-III B diffractometer (Rigaku) by Cu  $K_{\alpha}$  radiation ( $\lambda = 1.5406 \text{ \AA}$ ). Raman spectra was obtained on a HR800 UV spectrometer (Jobin Yvon) excited by a laser of 457.9 nm. The N and P K-edge soft X-ray absorption near-edge structure (SXANES) analyses were implemented on 4B9B and 4B7A beamline at Beijing Synchrotron Radiation Facility (BSRF, China). The energy resolutions in 4B9B and 4B7A beamline were 0.20 and 0.30 eV, respectively. SXANES spectra were recorded in fluorescence yield (FY) mode and the storage ring was operated at 2.5 GeV with a beam current of approximately 250 mA. X-ray photoelectron spectroscopy (XPS) was collected using a AXIS Ultra spectrometer (Kratos) equipped with a delay line detector in ultrahigh vacuum. The binding energies in the XPS analysis were internally standardized with respect to C 1s (284.8 eV). Inductively coupled plasma-atomic emission spectroscopy (ICP-AES) analysis was collected on Optima 7000 DV (Perkin-Elmer). Samples for ICP-AES were prepared by ashing 10 mg of sample in muffle furnace (air atmosphere) at 800 °C for 2 h, and then leached out with HCl (10 wt % in water) and volume to 5 mL.  $^1\text{H}$  nuclear magnetic resonance ( $^1\text{H-NMR}$ ) was determined on an ultrasield400 (Bruker). The conductivity of the samples was measured using a RM3000+ 4-point probe instrument (Jandel Engineering Ltd.) by repeating the test in at least 10 different positions.

### **1.5 Electrochemical measurements**

The electrochemical measurements were taken on the CHI 760D electrochemical workstation equipped with a three-electrode system (CH instruments, Shanghai, China) in 0.5 M  $\text{H}_2\text{SO}_4$  aqueous solution at room temperature ( $25 \pm 1 \text{ }^\circ\text{C}$ ). A studied catalyst modified glassy carbon electrode (GCE) served as the working electrode, while graphite rod and saturated calomel electrode were used as the auxiliary and reference electrodes, respectively. All the potentials involved in this work were normalized to the reversible hydrogen electrode (RHE). The electrolyte was constantly bubbled with  $\text{H}_2$  gas (99.999 % purity) to avoiding the effects of dissolved oxygen and maintaining a constant RHE potential. For preparing working electrode, 1 mg of catalyst mixed with 10  $\mu\text{L}$  of 5 wt.% Nafion was ultrasonically dispersed in 0.2 mL of ethanol until homogenous catalyst ink was obtained. Then, 20  $\mu\text{L}$  of this catalyst ink was drop casted on the well-polished GCE surface evenly (the catalyst loading  $\sim 0.378 \text{ mg cm}^{-2}$ ) and allowed to dry under an infrared lamp. Linear sweep voltammetry (LSV) was measured for the

polarization curves (scan rate: 2 mV s<sup>-1</sup>) and all the polarization curves were recorded with 100 % *iR* compensation. The Tafel slope is obtained from Tafel equation as follows:  $\eta = b \times \log(j/j_0)$ , where  $\eta$  is the overpotential,  $b$  is the Tafel slope,  $j$  is the current density, and  $j_0$  is the exchange current density, respectively. The electrochemical doublelayer capacitance ( $C_{dl}$ ) was determined by CV method in a N<sub>2</sub>-saturated 0.5 M H<sub>2</sub>SO<sub>4</sub> aqueous solution and a non-Faradaic region at different scan rates of 40, 60, 80, 100, 120, 140, 160, 180 mV·s<sup>-1</sup>. Electrochemical impedance spectra (EIS) were recorded at open circuit potential with an amplitude of 5 mV over a frequency range from 0.01 to 100 kHz. The Faradic efficiency of HER catalysis defined as the ratio of the amount of experimentally determined H<sub>2</sub> to that of the theoretically expected H<sub>2</sub> from the reaction. Accordingly, the H<sub>2</sub> evolved from the reaction was measured by gas chromatography (GC2002, Shanghai, China) with CH<sub>4</sub> as internal standard and N<sub>2</sub> as a carrier gas for quantitative analysis.

### 1.6 Determination of ammonia

Concentration of produced ammonia was determined by the indophenol blue method.<sup>S3</sup> In detail, 2 mL of 1 M NaOH solution containing salicylic acid (5 wt%) and sodium citrate (5 wt%) was added into 2 mL of the electrolyte after electrochemical etching, followed by addition of 1 mL of 0.05 M NaClO and 0.2 mL of C<sub>5</sub>FeN<sub>6</sub>Na<sub>2</sub>O (1 wt%). The absorption spectrum was measured using an UV-vis spectrophotometer. The concentration of indophenol blue was determined using the absorbance at a wavelength of 655 nm. The concentration-absorbance curve was calibrated using standard ammonia chloride solution with a series of concentrations.

### References:

- S3. Z. G. Geng, Y. Liu, X. D. Kong, P. Li, K. Li, Z. Y. Liu, J. J. Du, M. Shu, R. Si and J. Zeng, *Adv. Mater.*, 2018, 30, 1803498.

### 1.7 TOF calculations

The TOFs of CNT-NP and CNT-VP in 0.5 M H<sub>2</sub>SO<sub>4</sub> for HER is calculated by the equation:

$$TOF = \frac{\text{Total number of hydrogen turnover/} \text{geometric area (cm}^2\text{)}}{\text{Number of active sites/} \text{geometric area (cm}^2\text{)}}$$

Total number of hydrogen turnover<sup>S4,S5</sup>

$$= (j \text{ mA cm}^{-2}) \left( \frac{1 \text{ C s}^{-1}}{10^3 \text{ mA}} \right) \left( \frac{1 \text{ mol e}^-}{96485.3 \text{ C}} \right) \left( \frac{1 \text{ mol H}_2}{2 \text{ mol e}^-} \right) \left( \frac{6.022 \times 10^{23} \text{ molecules H}_2}{1 \text{ mol H}_2} \right) \text{ per mA cm}^{-2}$$

The number of active synergy sites is assumed to be equal to the number of N and all of these sites are accessible to the electrolyte. The real number of active and accessible sites should be considerably lower than the calculated value and the content of N is revealed by the XPS measurements. Accordingly, number of active sites

$$= \left( W_N \times \frac{1 \text{ mmol}}{14.004 \text{ mg}} \right) \times 0.378 \text{ mg cm}^{-2} \times 6.022 \times 10^{20} \text{ sites mmol}^{-1}$$

Where  $W_N$  is the mass content of N.

## References:

- S4. H. W. Liang, S. Bruller, R. H. Dong, J. Zhang, X. L. Feng and K. Mullen, *Nat. Commun.*, 2015, 6, 7992.
- S5. J. N. Tiwari, S. Sultan, C. W. Myung, T. Yoon, N. N. Li, M. R. Ha, A. M. Harzandi, H. J. Park, D. Y. Kim, S. S. Chandrasekaran, W. G. Lee, V. Vij, H. J. Kang, T. J. Shin, H. S. Shin, G. Lee, Z. Lee and K. S. Kim, *Nat. Energy*, 2018, 3, 773-782.

## 1.8 Calculation methods

DFT calculations were performed by using the CASTEP code.<sup>S6,S7</sup> The form of computing was delineated by the Perdew-Burke-Ernzerh (PBE) functional of the generalized gradient approximation (GGA). The ion-electron interaction was modelled by the frozen core all-electron projector augmented wave pseudopotentials. The electron wave functions were expanded by using a plane wave basis set with a cutoff energy of 400 eV. The structure of model was fully optimized by taking 0.01 eV Å<sup>-1</sup> as the convergence threshold. The density of states (DOS) was computed by using a  $7 \times 6 \times 1$   $k$ -point mesh. The Gibbs free-energy of hydrogen adsorption ( $\Delta G_{H^*}$ ) at  $T = 298.15$  K was obtained as  $\Delta G_{H^*} = \Delta E_{H^*} + \Delta E_{ZPE} - T\Delta S_H$ ,<sup>S8</sup> where  $\Delta E_{H^*}$  is the hydrogen absorption energy,  $\Delta E_{ZPE}$  is the difference in zero point energy between the adsorbed hydrogen and hydrogen in the gas phase and  $\Delta S_H$  is the entropy difference between the adsorbed state and the gas phase. Given that the vibrational entropy of hydrogen on the adsorbed state is extremely small,<sup>S9</sup> the formula for  $\Delta G_{H^*}$  can also be simplified as  $\Delta G_{H^*} = \Delta E_{H^*} + 0.24$  eV. And  $\Delta E_{H^*}$  can be defined as  $\Delta E_{H^*} = (1/n) (\Delta E_{M+nH^*} - \Delta E_M) - 0.5E_{H_2}$ , where  $\Delta E_{M+nH^*}$  is the total energies of the doped graphene with  $n$  adsorbed H atoms on the surface,  $\Delta E_M$  is the total energy of the doped graphene and  $E_{H_2}$  is the energy of a H<sub>2</sub> molecule.

## References:

- S6. Y. S. Wu, X. J. Liu, D. D. Han, X. Y. Song, L. Shi, Y. Song, S. W. Niu, Y. F. Xie, J. Y.

- Cai, S. Y. Wu, J. Kang, J. B. Zhou, Z. Y. Chen, X. S. Zheng, X. H. Xiao and G. M. Wang, *Nat. Commun.*, 2018, 9, 1425.
- S7. J. Q. Zhu, Z. Y. Ren, S. C. Du, Y. Xie, J. Wu, H. Y. Meng, Y. Z. Xue and H. G. Fu, *Nano Res.*, 2017, 10, 1819-1831.
- S8. Y. Zheng, Y. Jiao, Y. Zhu, L. H. Li, Y. Han, Y. Chen, A. Du, M. Jaroniec and S. Z. Qiao, *Nat. Commun.*, 2014, 5, 3783.
- S9. Y. Ito, W. T. Cong, T. Fujita, Z. Tang and M. W. Chen, *Angew. Chem., Int. Ed.*, 2015, 54, 2131-2136.



## 2. Supplementary Figures

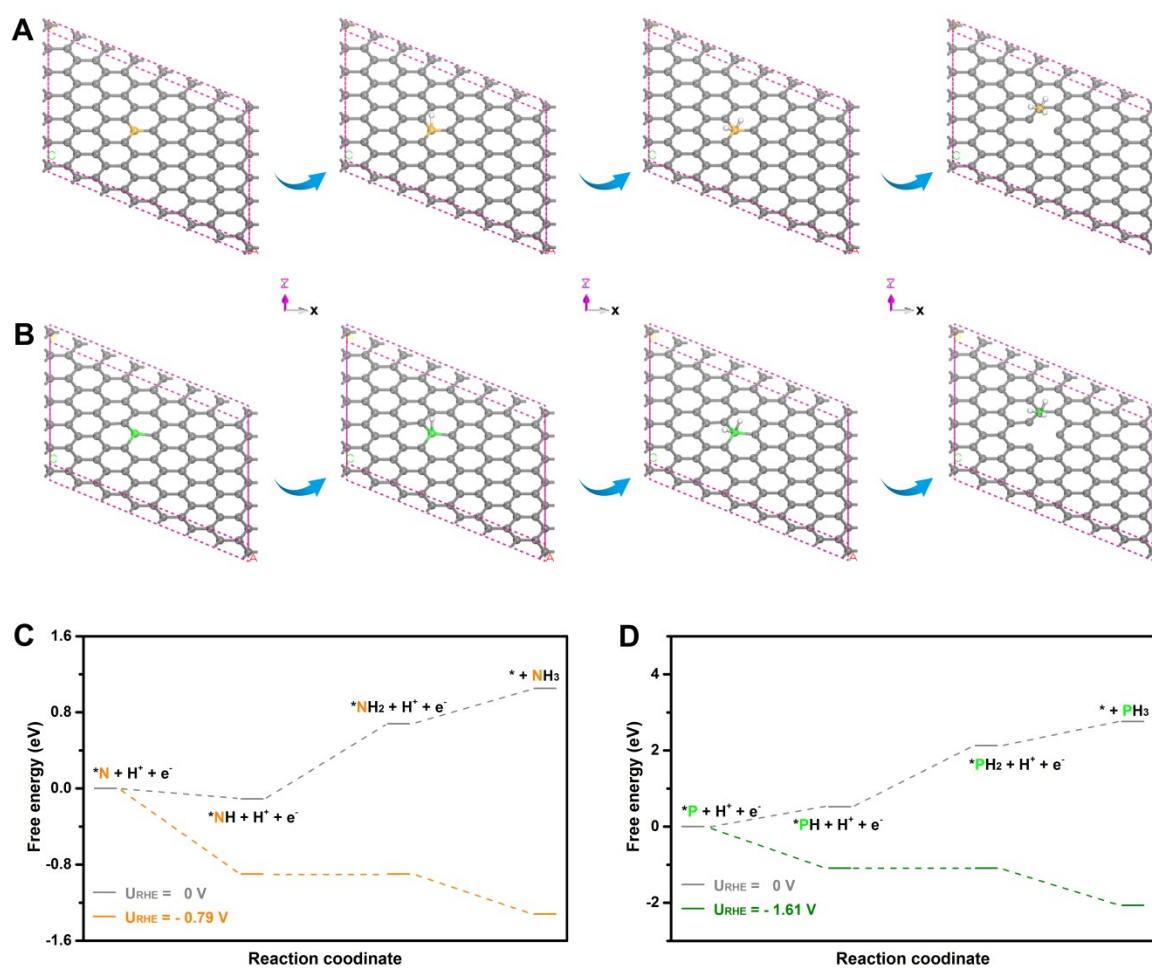

**Fig. S1.** (A and B) The optimized adsorption geometries corresponding to the proton–electron transfer steps in (C) and (D). The grey, orange, green and white balls respectively represent C, N, P and H atoms, and the unit cells of various models are indicated by purple dashed line. (C and D) The free energy diagram for the removal of N atom from N doped carbon (C) or P atom from P doped carbon (D). The \* denotes a vacancy and the \* prefix indicates that a species occupies a vacancy.

**Fig. S1** show that the theoretical potential required to remove the N atom from N doped carbon (-0.79 V) under acidic conditions is significantly lower than that required to remove the P atom from P doped carbon (-1.61 V). This indicates that the N atom in the N, P co-doped carbon may be preferentially electrochemically etched away.

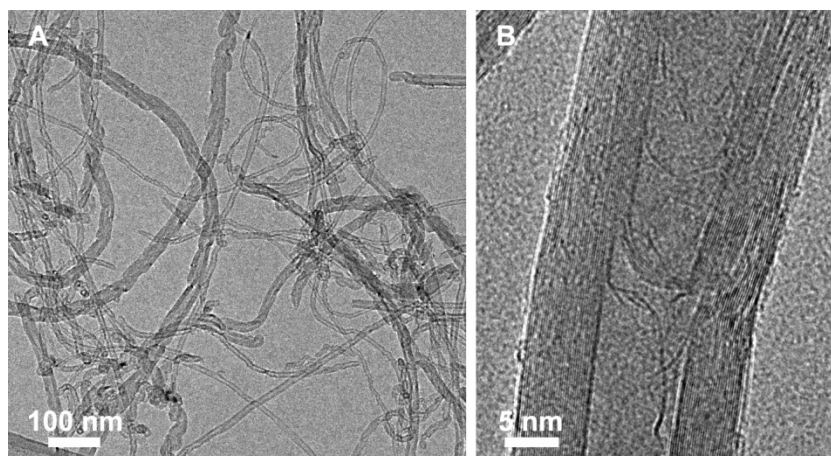

**Fig. S2.** TEM (A) and HRTEM (B) images of CNT.

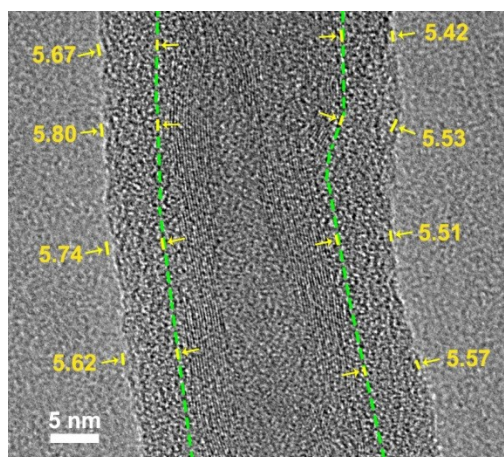

**Fig. S3.** HRTEM image of CNT@MP.

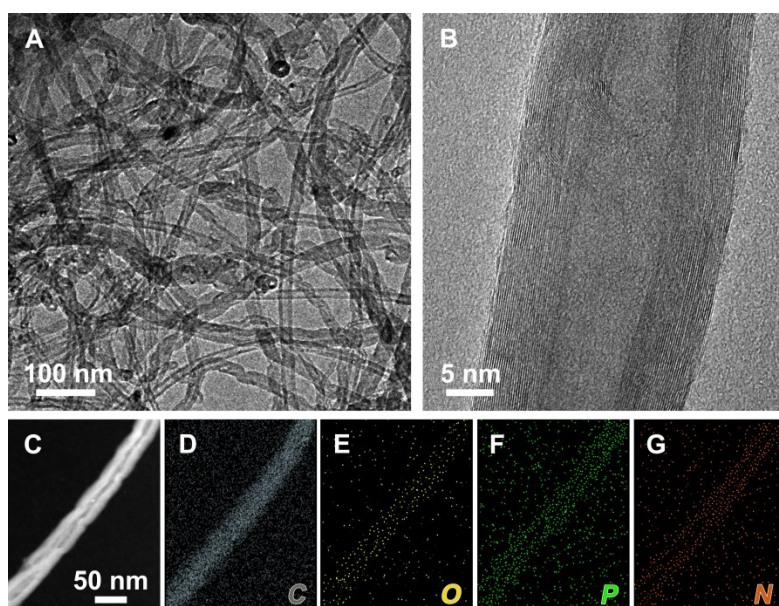

**Fig. S4.** TEM image (A), HRTEM image (B) and STEM-EDS mapping (C-G) of CNT-NP.

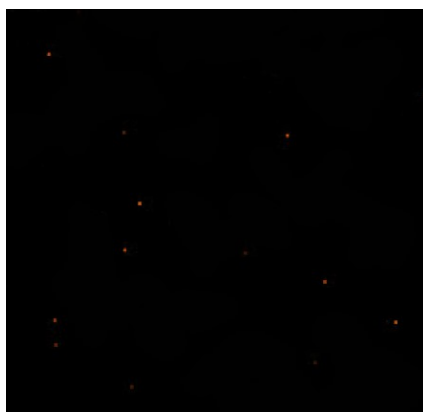

**Fig. S5.** The distribution of N on the surface of CNT-VP obtained from STEM-EDS mapping.

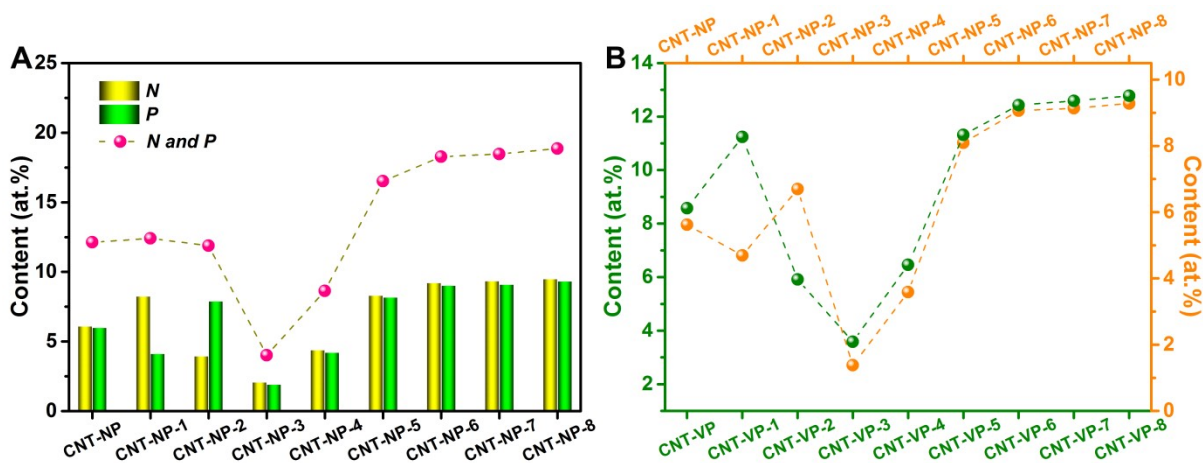

**Fig. S6.** The content of heteroatoms in CNT-NP (A), the content of P in CNT-VP and the content of N in CNT-NP (B) obtained from XPS analysis.

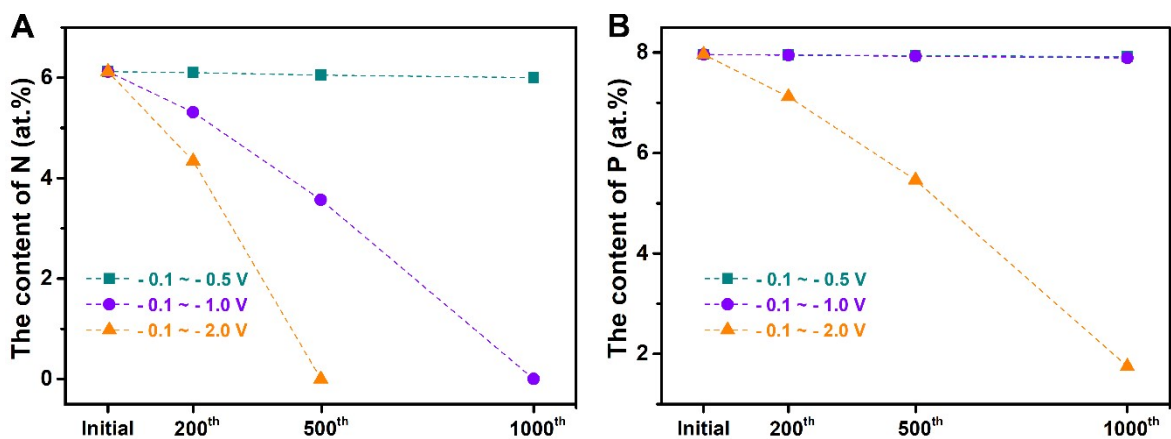

**Fig. S7.** The content of N in CNT-NP (A) and the content of P in CNT-VP (B) with different CV cycles and potential range (vs. RHE) in 0.5 M H<sub>2</sub>SO<sub>4</sub> at the scan rate of 2 mV s<sup>-1</sup>. These results were obtained from XPS analysis.

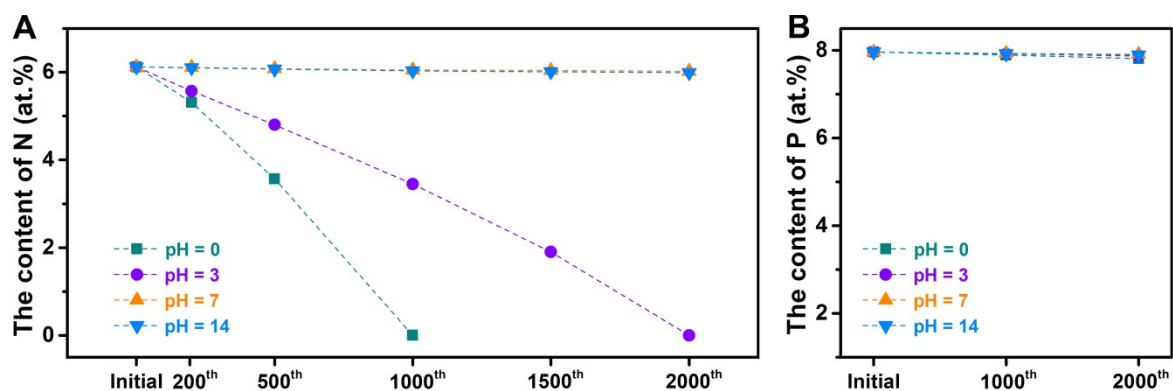

**Fig. S8.** The content of N in CNT-NP (A) and the content of P in CNT-VP (B) with different CV cycles between  $-0.1$  and  $-1.0$  V (vs. RHE) in solutions with different pH at the scan rate of  $2 \text{ mV s}^{-1}$ . These results were obtained from XPS analysis.

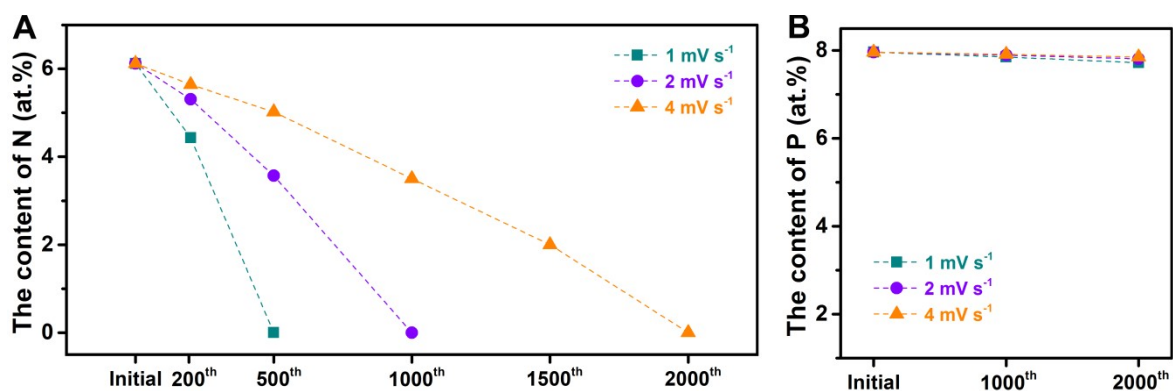

**Fig. S9.** The content of N in CNT-NP (A) and the content of P in CNT-VP (B) with different CV cycles between  $-0.1$  and  $-1.0$  V (vs. RHE) in  $0.5 \text{ M H}_2\text{SO}_4$  at the scan rate of 1, 2 and  $4 \text{ mV s}^{-1}$ , respectively. These results were obtained from XPS analysis.

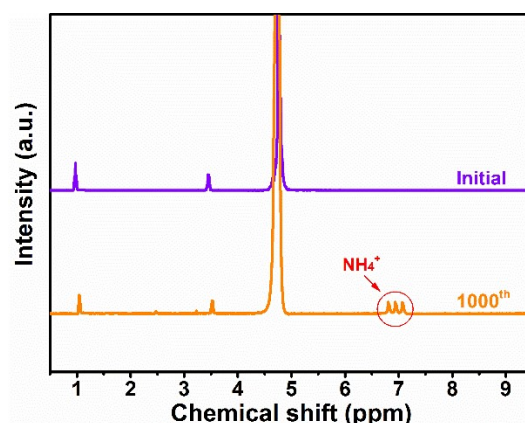

**Fig. S10.**  $^1\text{H}$ -NMR of electrolyte in  $\text{D}_2\text{O}$  for CNT-NP initially and after 1000 cycles.

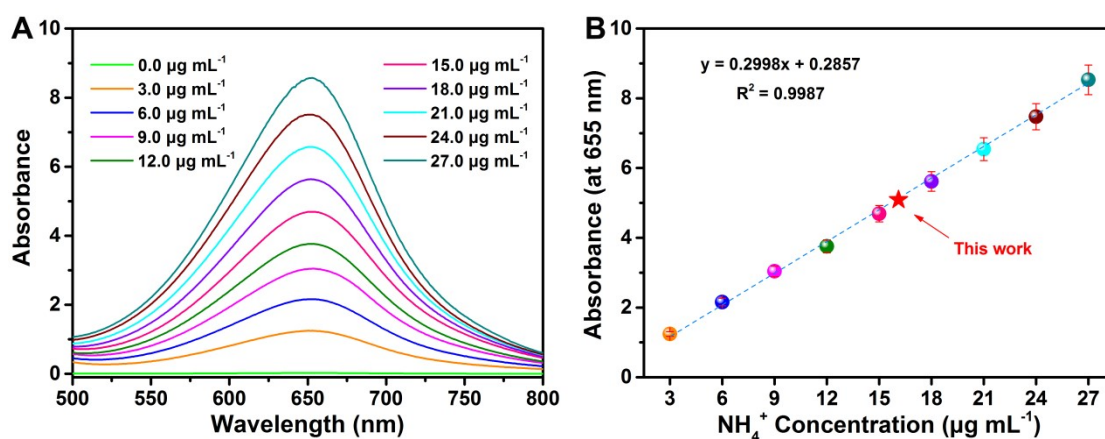

**Fig. S11.** UV-vis curves (A) and concentration-absorbance curve of  $\text{NH}_4^+$  ions solution with a series of standard concentration (B). The absorbance at 655 nm was measured by UV-vis spectrophotometer. The standard curve showed good linear relation of absorbance with  $\text{NH}_4^+$  ion concentration ( $y = 0.2998x + 0.2857$ ,  $R^2 = 0.9987$ ).

As shown in **Fig. S11**, the indophenol blue method can be used to determine the content of  $\text{NH}_4^+$  in the post-etching electrolyte. When 10 mg of CNT-NP is electrochemically etched, the content of  $\text{NH}_4^+$  in 50 mL of electrolyte is found to be about  $16.11 \mu\text{g mL}^{-1}$ .

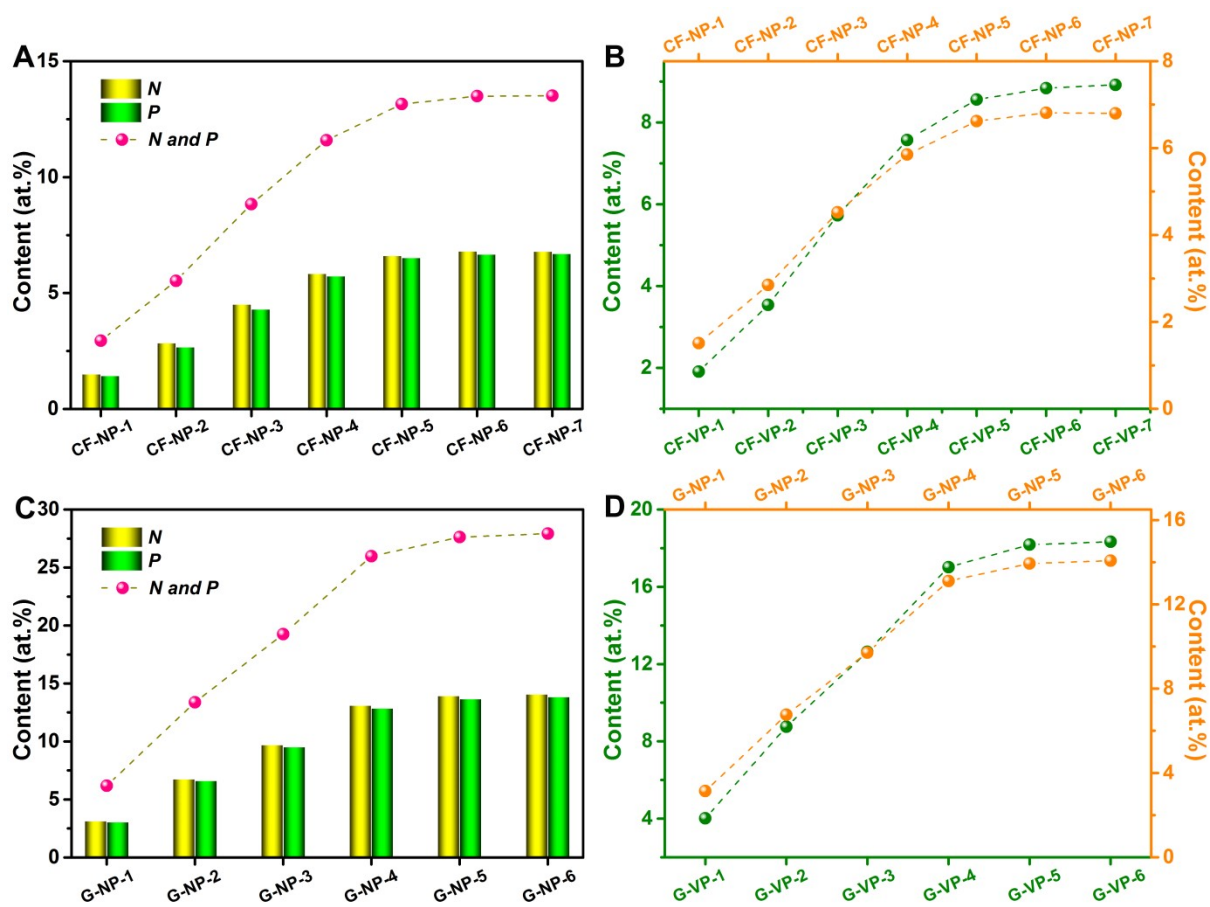

**Fig. S12.** (A) The content of heteroatoms in CF-NP. (B) the content of P in CF-NP-VP and the content of N in CF-NP. (C) The content of heteroatoms in G-NP. (D) the content of P in G-NP-VP and the content of N in G-NP.

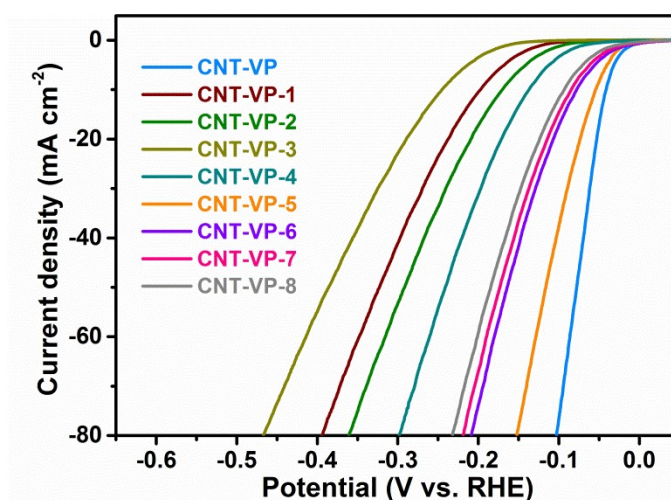

**Fig. S13.** *iR*-compensated HER polarization curves of the various CNT-VP catalysts in 0.5 M  $\text{H}_2\text{SO}_4$ .

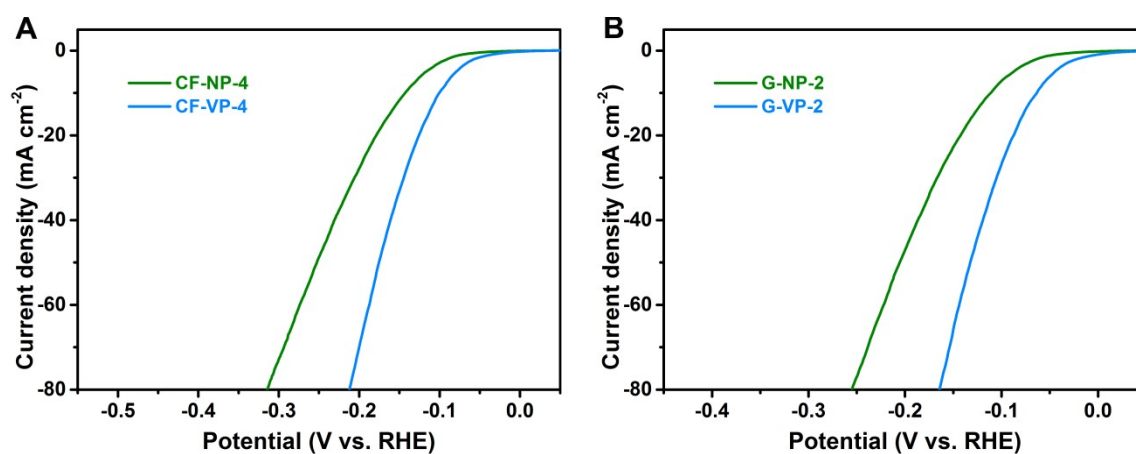

**Fig. S14.** *iR*-compensated HER polarization curves of CF-NP-4 and CF-VP-4 (A) and G-NP-2 and G-VP-2 (B) in 0.5 M  $\text{H}_2\text{SO}_4$ .



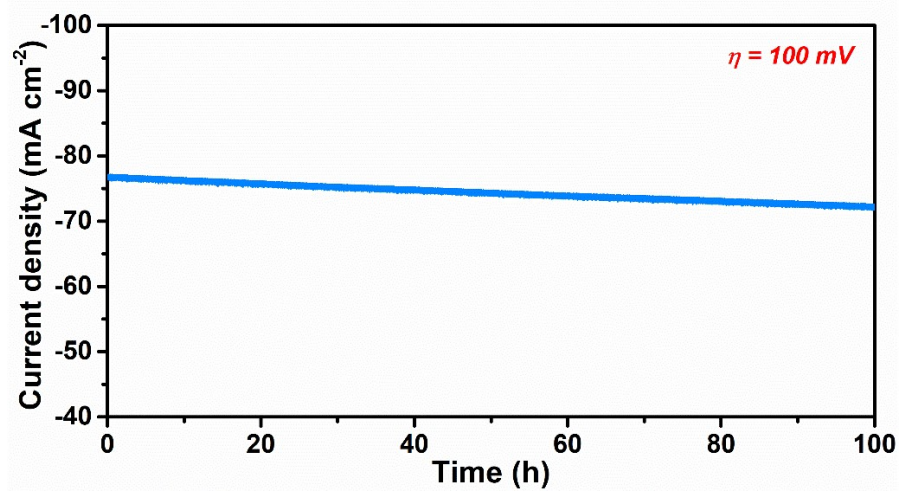

*Fig. S15.* *iR*-compensated time dependence of the current density for 100 h ( $\eta = 100 \text{ mV}$ ) of CNT-VP in 0.5 M H<sub>2</sub>SO<sub>4</sub>.

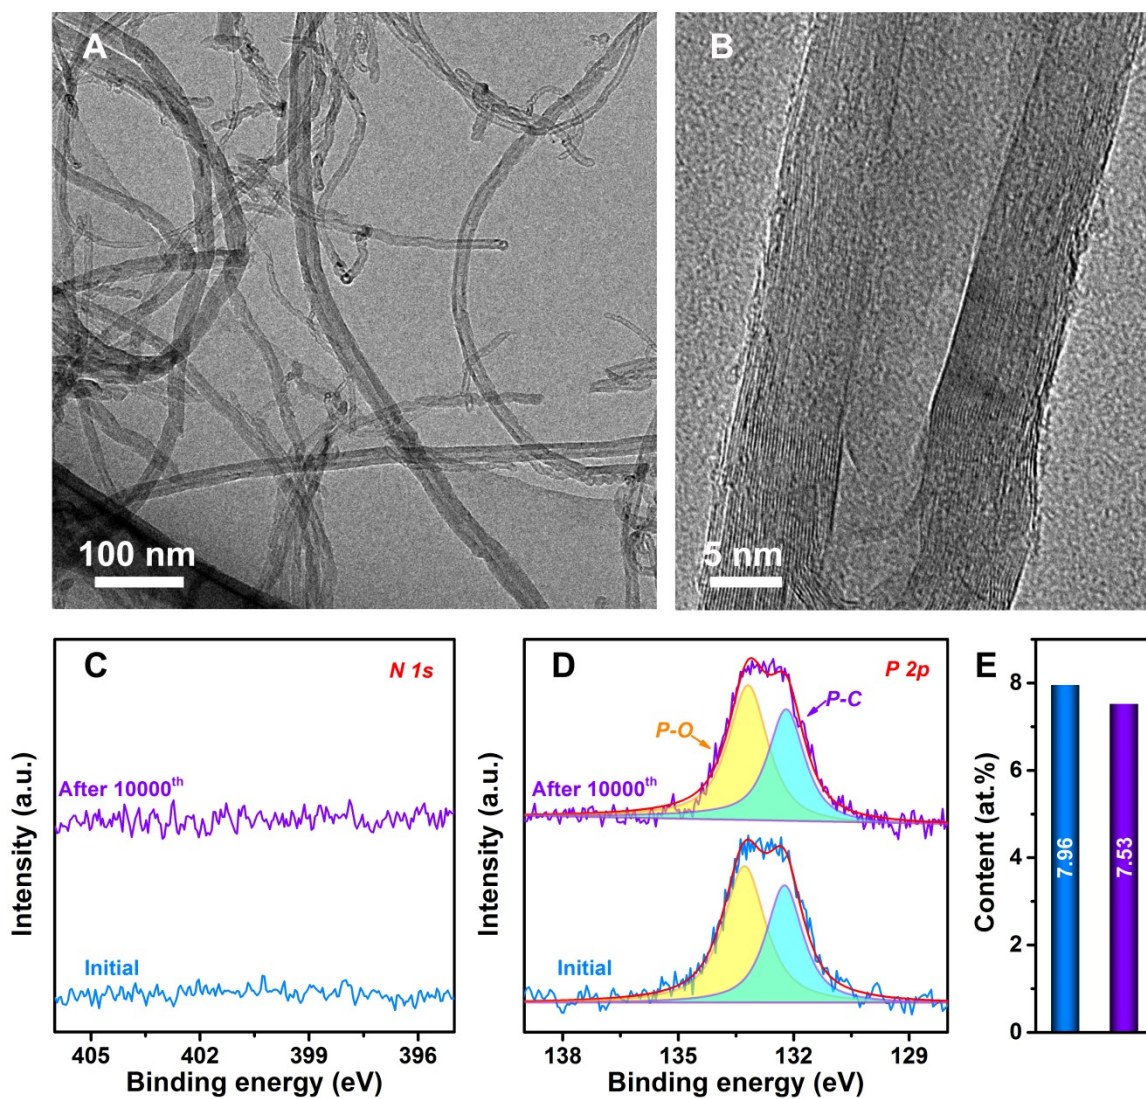

**Fig. S16.** (A and B) TEM (A) and HRTEM (B) images of CNT-VP after 10000 CV cycles. (C-E) The high-resolution N 1s XPS spectra (C), high-resolution P 2p XPS spectra (D) and the corresponding P atomic percentages (E) of CNT-VP initially and after 10000 CV cycles.

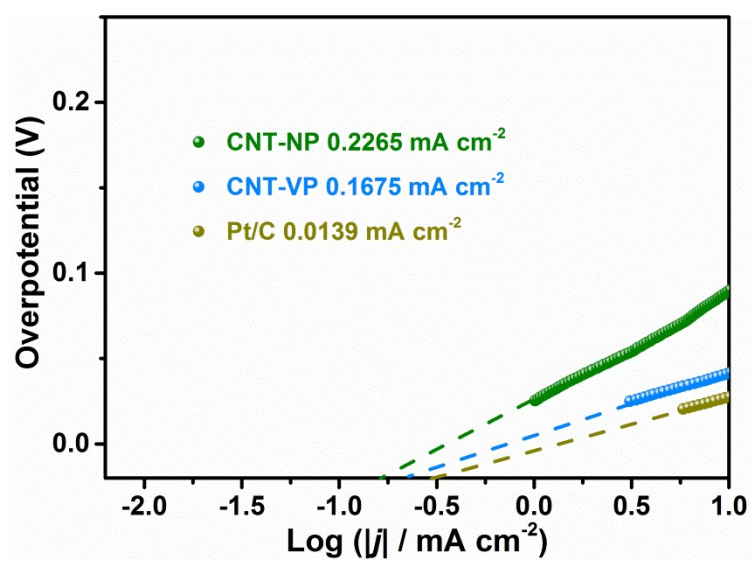

**Fig. S17.** The measured  $j_0$  of CNT-NP, CNT-VP and Pt/C by using an extrapolation method.

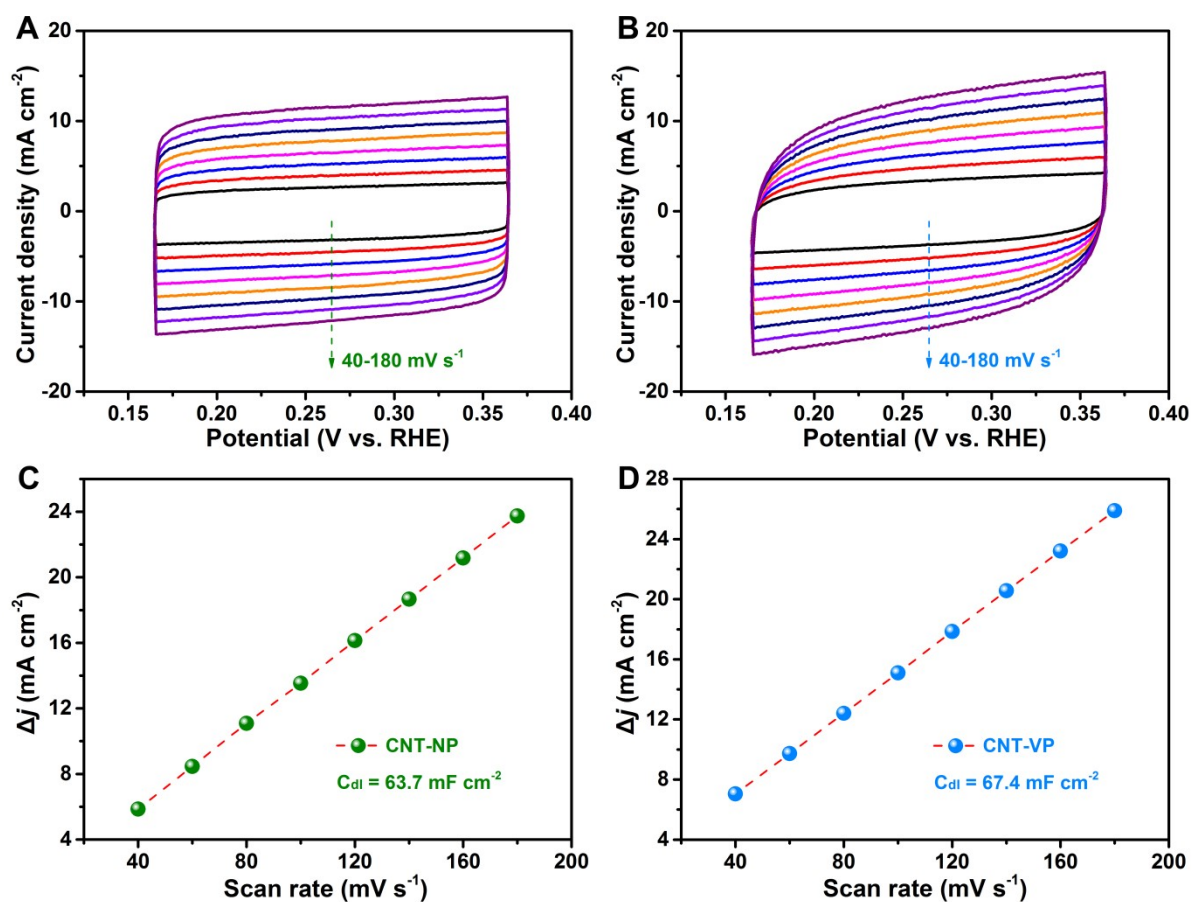

**Fig. S18.** (A and B) CVs for CNT-NP (A) and CNT-VP (B) at different scan rate from 40 to 180  $\text{mV s}^{-1}$ . (C and D) The differences in current density ( $\Delta j$ ) at 0.265 V (vs. RHE) as a function of scan rate for CNT-NP (C) and CNT-VP (D).

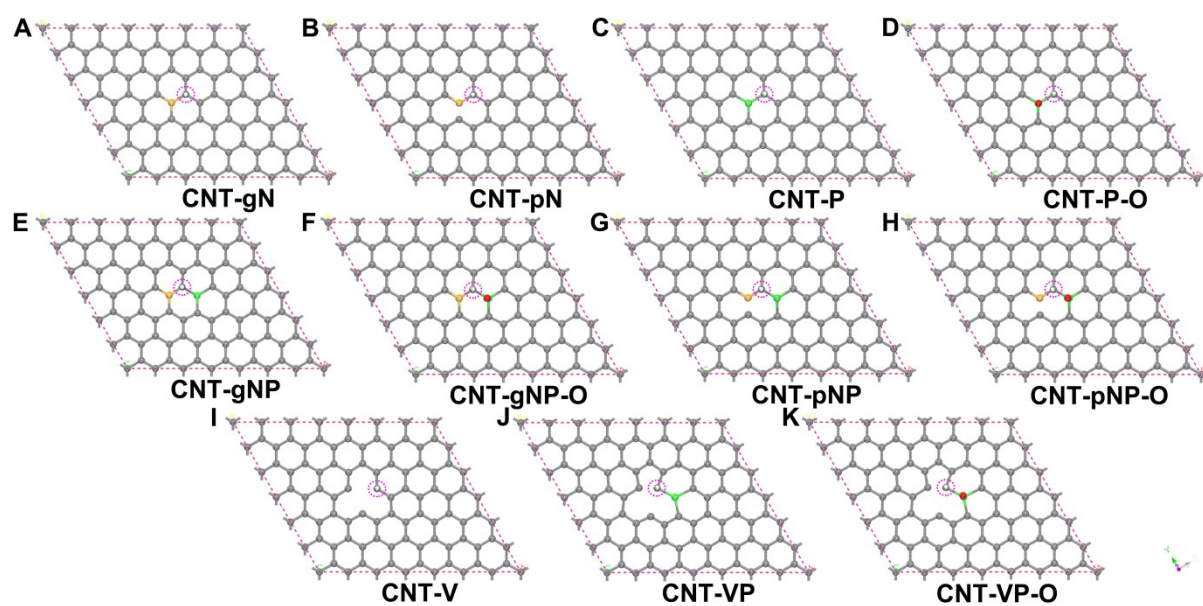

**Fig. S19.** A variety of optimized models used to simulate the structure of CNT-VP and reference samples, in which the most active of hydrogen adsorption sites are indicated by a pink dot circle. The grey, orange, red, green and white balls respectively represent C, N, O, P and H atoms, and the unit cells of various models are indicated by purple dashed line.

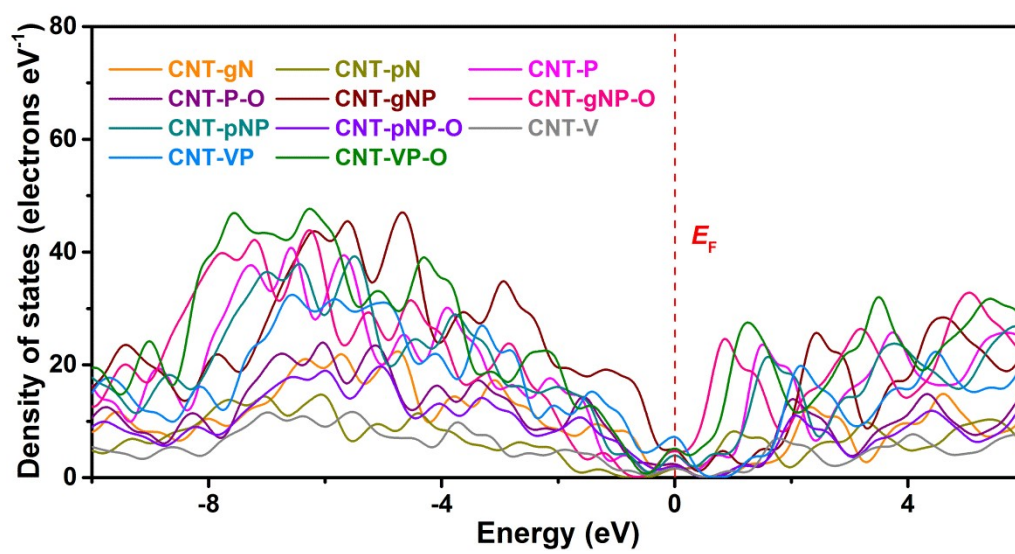

*Fig. S20.* The DOS plots of CNT-VP and reference models.

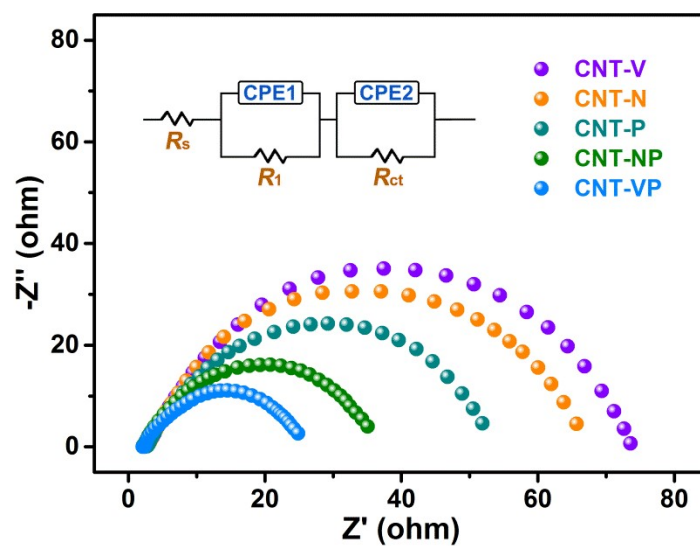

**Fig. S21.** Nyquist plots of CNT-V, CNT-N, CNT-P, CNT-NP and CNT-VP, the inset is the equivalent circuit model applied to fit the Nyquist plots, where  $R_s$  is the electrolyte resistance,  $R_1$  relates to the interfacial resistance resulting from the electron transport between the catalyst and the GCE,  $R_{ct}$  is the charge-transfer resistance and CPE1 and CPE2 represent the double layer capacitance.

## 2. Supplementary Tables

**Table S1.** The typical Raman bands of MP.<sup>S10,S11</sup>

| Raman shift (cm <sup>-1</sup> ) | Assignment                                                                    |
|---------------------------------|-------------------------------------------------------------------------------|
| 983                             | Ring breathing mode of triazine ring                                          |
| 918                             | PO <sub>4</sub> stretching                                                    |
| 690                             | Ring breathing mode and an in-plane deformation of triazine ring              |
| 572                             | PO <sub>4</sub> bending in HPO <sub>4</sub> <sup>2-</sup> group               |
| 382                             | PO <sub>4</sub> bending in H <sub>2</sub> PO <sub>4</sub> <sup>2-</sup> group |

### References:

- S10. I. Liascukiene, M. Ben Salah, R. Sabot, P. Refait, L. Dhouibi, C. Methivier, J. Landoulsi and M. Jeannin, *Appl. Surf. Sci.*, 2018, 434, 561-572.
- S11. J. M. Li, Y. Yang and D. Qin, *J. Mater. Chem. C*, 2014, 2, 9934-9940.



**Table S2.** The elemental composition of various CNT-NP and CNT-VP catalysts obtained from XPS analysis.

| Samples         | XPS analysis (at.%) |      |      |      | Samples         | XPS analysis (at.%) |      |     |       |
|-----------------|---------------------|------|------|------|-----------------|---------------------|------|-----|-------|
|                 | C                   | O    | N    | P    |                 | C                   | O    | N   | P     |
| <b>CNT-NP</b>   | 84.66               | 3.21 | 6.12 | 6.01 | <b>CNT-VP</b>   | 86.86               | 5.18 | --- | 7.96  |
| <b>CNT-NP-1</b> | 85.37               | 2.22 | 8.27 | 4.14 | <b>CNT-VP-1</b> | 88.05               | 5.14 | --- | 6.81  |
| <b>CNT-NP-2</b> | 83.71               | 4.41 | 3.97 | 7.91 | <b>CNT-VP-2</b> | 84.92               | 5.79 | --- | 9.29  |
| <b>CNT-NP-3</b> | 94.85               | 1.13 | 2.09 | 1.93 | <b>CNT-VP-3</b> | 95.44               | 1.85 | --- | 2.71  |
| <b>CNT-NP-4</b> | 89.39               | 1.97 | 4.41 | 4.23 | <b>CNT-VP-4</b> | 91.24               | 3.32 | --- | 5.44  |
| <b>CNT-NP-5</b> | 79.33               | 4.15 | 8.33 | 8.19 | <b>CNT-VP-5</b> | 82.13               | 6.85 | --- | 11.02 |
| <b>CNT-NP-6</b> | 77.10               | 4.63 | 9.23 | 9.04 | <b>CNT-VP-6</b> | 79.97               | 7.81 | --- | 12.22 |
| <b>CNT-NP-7</b> | 77.01               | 4.52 | 9.36 | 9.11 | <b>CNT-VP-7</b> | 79.79               | 7.90 | --- | 12.31 |
| <b>CNT-NP-8</b> | 76.36               | 4.78 | 9.51 | 9.35 | <b>CNT-VP-8</b> | 79.35               | 8.16 | --- | 12.49 |

**Notes:** the content of N in various CNT-VP catalysts exceeds the detection limits of the machine (Kratos AXIS Ultra spectrometer).

**Table S3.** The ICP-AES results of various CNT-VP catalysts.

| <b>Samples</b>  | <b>Fe (wt.%)</b> | <b>Co (wt.%)</b> | <b>Ni (wt.%)</b> | <b>Pt (wt.%)</b> |
|-----------------|------------------|------------------|------------------|------------------|
| <b>CNT-VP</b>   | <0.0010          | <0.0010          | <0.0010          | <0.0010          |
| <b>CNT-VP-1</b> | <0.0010          | <0.0010          | <0.0010          | <0.0010          |
| <b>CNT-VP-2</b> | <0.0010          | <0.0010          | <0.0010          | <0.0010          |
| <b>CNT-VP-3</b> | <0.0010          | <0.0010          | <0.0010          | <0.0010          |
| <b>CNT-VP-4</b> | <0.0010          | <0.0010          | <0.0010          | <0.0010          |
| <b>CNT-VP-5</b> | <0.0010          | <0.0010          | <0.0010          | <0.0010          |
| <b>CNT-VP-6</b> | <0.0010          | <0.0010          | <0.0010          | <0.0010          |
| <b>CNT-VP-7</b> | <0.0010          | <0.0010          | <0.0010          | <0.0010          |
| <b>CNT-VP-8</b> | <0.0010          | <0.0010          | <0.0010          | <0.0010          |

**Notes:** the content of Fe, Co, Ni and Pt exceeds the detection limits of the machine (Perkin-Elmer Optima 7000 DV).

**Table S4.** The elemental composition of various CF-NP, CF-VP, G-NP and G-VP catalysts obtained from XPS analysis.

| Samples        | XPS analysis (at.%) |      |       |       | Samples        | XPS analysis (at.%) |       |     |       |
|----------------|---------------------|------|-------|-------|----------------|---------------------|-------|-----|-------|
|                | C                   | O    | N     | P     |                | C                   | O     | N   | P     |
| <b>CF-NP-1</b> | 96.16               | 0.89 | 1.51  | 1.44  | <b>CF-VP-1</b> | 96.63               | 1.46  | --- | 1.91  |
| <b>CF-NP-2</b> | 92.88               | 1.59 | 2.85  | 2.68  | <b>CF-VP-2</b> | 93.73               | 2.73  | --- | 3.54  |
| <b>CF-NP-3</b> | 88.89               | 2.28 | 4.52  | 4.31  | <b>CF-VP-3</b> | 90.34               | 3.93  | --- | 5.73  |
| <b>CF-NP-4</b> | 85.40               | 3.01 | 5.85  | 5.74  | <b>CF-VP-4</b> | 87.29               | 5.14  | --- | 7.57  |
| <b>CF-NP-5</b> | 83.38               | 3.47 | 6.62  | 6.53  | <b>CF-VP-5</b> | 85.59               | 5.85  | --- | 8.56  |
| <b>CF-NP-6</b> | 82.98               | 3.53 | 6.81  | 6.68  | <b>CF-VP-6</b> | 85.18               | 5.98  | --- | 8.84  |
| <b>CF-NP-7</b> | 82.90               | 3.59 | 6.80  | 6.71  | <b>CF-VP-7</b> | 84.99               | 6.09  | --- | 8.92  |
| <b>G-NP-1</b>  | 92.13               | 1.68 | 3.14  | 3.05  | <b>G-VP-1</b>  | 93.05               | 2.94  | --- | 4.01  |
| <b>G-NP-2</b>  | 83.11               | 3.51 | 6.76  | 6.62  | <b>G-VP-2</b>  | 85.33               | 5.91  | --- | 8.76  |
| <b>G-NP-3</b>  | 75.72               | 5.03 | 9.71  | 9.54  | <b>G-VP-3</b>  | 79.03               | 8.34  | --- | 12.63 |
| <b>G-NP-4</b>  | 67.20               | 6.83 | 13.11 | 12.86 | <b>G-VP-4</b>  | 71.59               | 11.39 | --- | 17.02 |
| <b>G-NP-5</b>  | 65.27               | 7.11 | 13.94 | 13.68 | <b>G-VP-5</b>  | 69.87               | 11.95 | --- | 18.18 |
| <b>G-NP-6</b>  | 64.84               | 7.24 | 14.07 | 13.85 | <b>G-VP-6</b>  | 69.55               | 12.12 | --- | 18.33 |

**Notes:** the content of N in various CF-VP and G-VP catalysts exceeds the detection limits of the machine (Kratos AXIS Ultra spectrometer).

**Table S5.** Comparison of HER performance of CNT-VP with the recently reported metal-free catalysts in 0.5 M H<sub>2</sub>SO<sub>4</sub>.

| Catalysts                                 | Substrate  | $\eta@10$<br>mA·cm <sup>-2</sup><br>(mV) | Tafel<br>slope<br>(mV/dec) | Reference                                          |
|-------------------------------------------|------------|------------------------------------------|----------------------------|----------------------------------------------------|
| <b>CNT-VP</b>                             | <b>GCE</b> | <b>41</b>                                | <b>36.5</b>                | <b>This work</b>                                   |
| *GDY/CFC                                  | GCE        | 94                                       | 45                         | <i>Angew. Chem. Int. Ed.</i> 2022, 61, e202211094. |
| Csp2-O-GDY                                | GCE        | 101                                      | 54                         | <i>2D Mater.</i> 2022, 9, 024001.                  |
| *COF-GO                                   | GCE        | 45                                       | 53                         | <i>Angew. Chem. Int. Ed.</i> 2022, 61, e202113067. |
| S doped G/CF                              | GCE        | 443                                      | 165                        | <i>ChemElectroChem</i> 2022, 9, e202101455.        |
| G nanowall                                | GCE        | 320                                      | 86                         | <i>Appl. Surf. Sci.</i> 2022, 592, 153327.         |
| Porous C Nanofiber                        | GCE        | ~260                                     | 96                         | <i>ACS Appl. Mater. Interfaces</i> 2022, 14, 834.  |
| N, S codoped C                            | GCE        | 118.7                                    | 53                         | <i>Ionics</i> 2022, 28, 1311.                      |
| Edge-halogenated G                        | GCE        | 810                                      | 52                         | <i>Int. J. Hydrogen Energy</i> 2022, 47, 15731.    |
| BCN/C <sub>60</sub>                       | GCE        | ~210                                     | 87                         | <i>J. Am. Chem. Soc.</i> 2021, 143, 1203.          |
| rGO/SiO <sub>2</sub>                      | GCE        | 134                                      | 103                        | <i>Small Methods</i> 2021, 5, 2100621.             |
| Ethylenediamine/CNT                       | GCE        | ~600                                     | 75                         | <i>New J. Chem.</i> 2021, 45, 3932.                |
| Ionic liquid/CNT                          | GCE        | 135                                      | 38                         | <i>Nanoscale</i> , 2021, 13, 4444.                 |
| N doped vertical G                        | GCE        | 290                                      | 121                        | <i>Mater. Res. Bull.</i> 2021, 134, 111094.        |
| 1,2,4-triamino-GDY                        | GCE        | 82                                       | 74.13                      | <i>J. Catal.</i> 2021, 395, 129.                   |
| BCN@G                                     | GCE        | 333                                      | 39                         | <i>ACS Appl. Energy Mater.</i> 2021, 4, 3861.      |
| *GDY/CF                                   | GCE        | 68                                       | 41.6                       | <i>Small</i> 2021, 17, 2006136.                    |
| N doped C                                 | GCE        | 151                                      | 45                         | <i>Polymers</i> 2020, 12, 912.                     |
| Black phosphorus/B doped G                | GCE        | 385.9                                    | 110                        | <i>J. Mater. Chem. A</i> 2020, 8, 20446.           |
| N, P codoped G                            | GCE        | 338                                      | 88                         | <i>J. Phys. Chem. C</i> 2020, 124, 25701.          |
| O-SiBCN/rGO                               | GCE        | 590                                      | 127                        | <i>Sci. Rep.</i> 2020, 10, 22003.                  |
| Red P-rGO-g-C <sub>3</sub> N <sub>4</sub> | GCE        | 577                                      | 122.5                      | <i>Electrochim. Acta</i> 2020, 338, 135851.        |
| N, S-CNT/N, S-G                           | GCE        | 126                                      | 97                         | <i>J. Alloy. Compd.</i> 2020, 848, 156528.         |
| N doped C                                 | GCE        | ~730                                     | ---                        | <i>React. Chem. Eng.</i> 2020, 5, 2134.            |
| P doped graphite                          | GCE        | 303                                      | 42                         | <i>Adv. Funct. Mater.</i> 2020, 30, 1910741.       |

|                                                        |              |       |       |                                                |
|--------------------------------------------------------|--------------|-------|-------|------------------------------------------------|
| <i>N doped hollow C nanoflower</i>                     | GCE          | 243   | 111   | <i>Nanoscale</i> 2020, 12, 14441.              |
| <i>N, P, S tridoped porous C</i>                       | GCE          | 260   | 86    | <i>Carbon</i> 2020, 162, 586.                  |
| <i>Red phosphorus nanoparticle</i>                     | GCE          | 218   | 156   | <i>Chem. Commun.</i> 2020, 56, 2937.           |
| <i>Red phosphorus/rGO/g-C<sub>3</sub>N<sub>4</sub></i> | GCE          | 575   | 122.5 | <i>Electrochim. Acta</i> 2020, 338, 135851.    |
| <i>N doped C fiber</i>                                 | GCE          | 114.3 | 95.2  | <i>Int. J. Hydrogen Energy</i> 2020, 45, 4035. |
| <i>N-rich glassy C</i>                                 | GCE          | 190   | 55    | <i>Mater. Res. Bull.</i> 2020, 124, 110734.    |
| <i>N doped porous C</i>                                | GCE          | 179   | 98    | <i>Nanomaterials.</i> 2020, 10, 76.            |
| <i>C<sub>60</sub>-CNT</i>                              | GCE          | 320   | 73.2  | <i>J. Am. Chem. Soc.</i> 2019, 141, 11658.     |
| <i>N, P codoped G</i>                                  | GCE          | 106   | 67.3  | <i>Energy Environ. Sci.</i> 2019, 12, 2697.    |
| <i>2D polyarylamines</i>                               | GCE          | 424   | 99    | <i>Chem. Eur. J.</i> 2019, 25, 13860.          |
| <i>*Dual graphitic-NG</i>                              | GCE          | 57    | 44.6  | <i>Angew. Chem. Int. Ed.</i> 2019, 58, 16973.  |
| <i>N doped activated C</i>                             | GCE          | 390   | 75.7  | <i>Appl. Surf. Sci.</i> 2019, 489, 725.        |
| <i>CNT@N,P codoped C</i>                               | GCE          | 167   | 81    | <i>Nanoscale</i> 2019, 11, 23027.              |
| <i>*A-CFC</i>                                          | CFC          | 78    | 37    | <i>Nat. Commun.</i> 2019, 10, 2281.            |
| <i>N, S codoped CNT</i>                                | GCE          | 131   | 71.9  | <i>Chem. Commun.</i> 2019, 55, 10011.          |
| <i>Multiporous C</i>                                   | GCE          | 184   | 164   | <i>New J. Chem.</i> 2019, 43, 11653.           |
| <i>N, P codoped G</i>                                  | GCE          | 340   | 118   | <i>Adv. Sci.</i> 2019, 6, 1900119.             |
| <i>N doped CNT</i>                                     | GCE          | 360   | 118   | <i>Catal. Lett.</i> 2019, 149, 486.            |
| <i>*N doped C</i>                                      | GCE          | 90    | 43    | <i>Energy Environ. Sci.</i> 2019, 12, 322.     |
| <i>N doped porous CF</i>                               | GCE          | 248   | 135   | <i>J. Solid State Chem.</i> 2019, 274, 207.    |
| <i>N doped C-CNT@poly (ethylene-alt-maleic acid)</i>   | N doped C    | 180   | ---   | <i>Angew. Chem. Int. Ed.</i> 2019, 58, 16217.  |
| <i>3D NG sponge</i>                                    | GCE          | 267   | 69.7  | <i>RSC Adv.</i> 2019, 9, 99.                   |
| <i>3D G</i>                                            | Si substrate | 107   | 64    | <i>Angew. Chem. Int. Ed.</i> 2018, 57, 192.    |
| <i>C<sub>3</sub>N<sub>4</sub>@G</i>                    | GCE          | 110   | 53    | <i>ACS Catal.</i> 2018, 8, 3965.               |
| <i>N, S codoped G</i>                                  | GCE          | 230   | 72    | <i>Angew. Chem. Int. Ed.</i> 2018, 57, 13302.  |
| <i>Hexagonal BN-G</i>                                  | GCE          | ~390  | ---   | <i>Phys. Chem. Chem. Phys</i> 2018, 20, 15007. |
| <i>NG</i>                                              | GCE          | 210   | ---   | <i>ACS Energy Lett.</i> 2018, 3, 1345.         |
| <i>Ethylenediamine-functionalized multiwalled CNT</i>  | GCE          | 350   | 116   | <i>Electrocatalysis</i> 2018, 9, 573.          |
| <i>P nanodot incorporated G</i>                        | GCE          | 440   | 46    | <i>J. Mater. Chem. A</i> 2018, 6, 3141.        |
| <i>NBC-ternary nanosheet</i>                           | GCE          | 590   | 205   | <i>Appl. Surf. Sci.</i> 2018, 448, 618.        |

|                                                                      |         |       |      |                                                    |
|----------------------------------------------------------------------|---------|-------|------|----------------------------------------------------|
| <i>N, P codoped G</i>                                                | GCE     | ~500  | 88   | <i>ChemistrySelect 2018, 3, 6814.</i>              |
| <i>N functionalized CNT</i>                                          | GCE     | 250   | ---  | <i>ChemCatChem 2018, 10, 3872.</i>                 |
| <i>3D S doped G</i>                                                  | GCE     | 218   | 64   | <i>J. Mater. Sci. 2018, 53, 7767.</i>              |
| <i>Amine functionalized NG</i>                                       | GCE     | 350   | 113  | <i>Carbon 2018, 138, 169.</i>                      |
| <i>CN<sub>x</sub>@NG</i>                                             | GCE     | 193   | 54   | <i>ChemElectroChem 2017, 13, 2643.</i>             |
| <i>Graphite CN/B doped G</i>                                         | GCE     | 260   | 90   | <i>Nanotechnology 2017, 29, 345705.</i>            |
| <i>g-C<sub>3</sub>N<sub>4</sub>@2D mesoporous G</i>                  | GCE     | 219   | 53   | <i>Adv. Funct. Mater. 2017, 27, 1606352.</i>       |
| <i>N doped C</i>                                                     | GCE     | 276   | 94   | <i>J. Mater. Chem. A 2017, 5, 6025.</i>            |
| <i>3D CNT</i>                                                        | GCE     | ~300  | ---  | <i>ACS Catal. 2017, 7, 2676.</i>                   |
| <i>NG</i>                                                            | GCE     | 128   | 66   | <i>Appl. Catal. A: General 2017, 529, 127.</i>     |
| <i>S doped g-C<sub>3</sub>N<sub>4</sub></i>                          | GCE     | 186   | 84   | <i>ACS Nano 2017, 11, 6004.</i>                    |
| <i>NG</i>                                                            | GCE     | ~380  | ---  | <i>ChemCatChem 2017, 9, 4049.</i>                  |
| <i>Covalent organic polymer</i>                                      | GCE     | 250   | 106  | <i>ACS Catal. 2017, 7, 6120.</i>                   |
| <i>NG</i>                                                            | GCE     | ~380  | ---  | <i>ChemCatChem 2017, 9, 4049.</i>                  |
| <i>NSC</i>                                                           | GCE     | 290   | 76.9 | <i>ACS Nano 2017, 11, 7293.</i>                    |
| <i>N, F codoped G</i>                                                | GCE     | 290   | 87   | <i>Catal. Sci. Technol. 2017, 7, 2228.</i>         |
| <i>Pyrene-porphyrin-based crystalline covalent organic framework</i> | GCE     | 380@5 | 116  | <i>ACS Appl. Mater. Interfaces 2017, 9, 23843.</i> |
| <i>N, S codoped G</i>                                                | Ni foam | 298   | 75   | <i>Int. J. Hydrogen Energy 2017, 42, 27004.</i>    |
| <i>*N doped CNT@NG</i>                                               | GCE     | 62    | 50   | <i>J. Mater. Chem. A 2017, 5, 6405.</i>            |
| <i>N doped C nanosheet</i>                                           | CC      | 320   | 198  | <i>Int. J. Hydrogen Energy 2017, 42, 14390.</i>    |
| <i>Defect-rich, N, B codoped C nanocage</i>                          | GCE     | 175.3 | ---  | <i>Nano Energy 2017, 42, 334.</i>                  |
| <i>G nanostripe</i>                                                  | GCE     | 560   | 85.3 | <i>Angew. Chem. Int. Ed. 2016, 55, 13965.</i>      |
| <i>N, P, S tridoped G</i>                                            | GCE     | 240   | 90   | <i>Adv. Mater. 2016, 28, 10644.</i>                |
| <i>BC<sub>7</sub>N<sub>2</sub></i>                                   | GCE     | 70@20 | 100  | <i>Energy Environ. Sci. 2016, 9, 95.</i>           |
| <i>N, S codoped G</i>                                                | GCE     | ~300  | 120  | <i>Nature Energy 2016, 1, 16130.</i>               |
| <i>Defect G</i>                                                      | GCE     | 150   | 55   | <i>Adv. Mater. 2016, 28, 9532.</i>                 |
| <i>S-C<sub>3</sub>N<sub>4</sub>/CNT/CF</i>                           | CF      | 236   | 81.6 | <i>J. Mater. Chem. A 2016, 4, 12878.</i>           |
| <i>N, P codoped C network</i>                                        | GCE     | 163   | 89   | <i>Angew. Chem. Int. Ed. 2016, 55, 2230.</i>       |
| <i>N, P codoped CF</i>                                               | GCE     | 151   | 69   | <i>J. Mater. Chem. A 2016, 4, 13726.</i>           |

|                                                    |     |      |       |                                                    |
|----------------------------------------------------|-----|------|-------|----------------------------------------------------|
| <i>Plasma-etched N, S codoped G</i>                | GCE | 149  | 78    | <i>Electrochim. Acta 2016, 219, 781.</i>           |
| <i>S doped C<sub>3</sub>N<sub>4</sub></i>          | GCE | 145  | 51    | <i>J. Mater. Chem. A 2016, 4, 12205.</i>           |
| <i>Horizontally-aligned CNT and G</i>              | GCE | 420  | 121   | <i>Carbon 2016, 107, 739.</i>                      |
| <i>B, N codoped G</i>                              | GCE | 216  | 92    | <i>J. Mater. Chem. A 2016, 4, 16469.</i>           |
| <i>Acid treated multiwalled CNT</i>                | GCE | ~180 | 71.3  | <i>ACS Appl. Mater. Interfaces 2016, 8, 35513.</i> |
| <i>Plasma-etched S doped G</i>                     | GCE | 178  | 86    | <i>Int. J. Hydrogen Energy 2016, 42, 4184.</i>     |
| <i>Defective activated C</i>                       | GCE | 334  | 66    | <i>Chem. Commun. 2016, 52, 8156.</i>               |
| <i>N doped C nanosheet</i>                         | GCE | 137  | 131.6 | <i>Electrochim. Acta 2016, 215, 223.</i>           |
| <i>N, S codoped CNT</i>                            | GCE | ~270 | 126   | <i>Chem. Eur. J. 2016, 22, 10326.</i>              |
| <i>N, S codoped G</i>                              | GCE | 276  | 81    | <i>Angew. Chem. Int. Ed. 2015, 54, 2131.</i>       |
| <i>NSC</i>                                         | GCE | 120  | 67.8  | <i>Nano Energy 2015, 16, 357.</i>                  |
| <i>*C<sub>3</sub>N<sub>4</sub>@NG</i>              | GCE | 80   | 49.1  | <i>ACS Nano 2015, 9, 931.</i>                      |
| <i>N, P codoped G</i>                              | GCE | 213  | 79    | <i>J. Mater. Chem. A 2015, 3, 12642.</i>           |
| <i>2D supramolecular polymer</i>                   | GCE | 333  | 80.5  | <i>Angew. Chem. Int. Ed. 2015, 54, 12058.</i>      |
| <i>g-C<sub>3</sub>N<sub>4</sub>/N, P codoped G</i> | GCE | 340  | 90    | <i>ChemCatChem 2015, 7, 3873.</i>                  |
| <i>N, P codoped porous C</i>                       | GCE | 204  | 58.4  | <i>J. Mater. Chem. A 2015, 3, 7210.</i>            |
| <i>Holey NG</i>                                    | GCE | 340  | 99    | <i>Nano Energy 2015, 15, 567.</i>                  |
| <i>NSC</i>                                         | GCE | 100  | 57.4  | <i>J. Mater. Chem. A 2015, 3, 8840.</i>            |
| <i>N, P codoped G</i>                              | GCE | ~420 | 91    | <i>ACS Nano 2014, 8, 5290.</i>                     |
| <i>C<sub>3</sub>N<sub>4</sub>@NG</i>               | GCE | ~240 | 51.5  | <i>Nat. Commun. 2014, 5, 3783.</i>                 |
| <i>B doped G</i>                                   | GCE | 470  | 99    | <i>Catal. Sci. Technol. 2014, 4, 2023.</i>         |
| <i>Activated CNT</i>                               | GCE | 220  | 71.3  | <i>Chem. Commun. 2014, 50, 9340.</i>               |
| <i>g-C<sub>3</sub>N<sub>4</sub> nanoribbon/G</i>   | GCE | 207  | 54    | <i>Angew. Chem. Int. Ed. 2014, 53, 13934.</i>      |
| <i>NG</i>                                          | GCE | 240  | 109   | <i>Sci. Rep. 2014, 4, 7557.</i>                    |

**Abbreviations:** G = Graphene; rGO = Reduced graphene oxide; GCE = Glassy carbon electrode; CFC = Carbon fiber cloth; A-CFC = Amide group functionalized CFC; NG = N doped G; NSC = N, S codoped carbon; C = Carbon; CC = Carbon cloth; CF = Carbon fiber; g-C<sub>3</sub>N<sub>4</sub> = graphitic-C<sub>3</sub>N<sub>4</sub>; CNT = Carbon nanotube; C<sub>60</sub> = Buckminsterfullerene; GDY = Graphdiyne; COF = covalentorganic framework

**Notes:** the \* prefix indicates that the overpotential and Tafel slope of the catalysts are included in **Fig. 3c**.

**Table S6.** Parameters obtained by fitting the Nyquist plots of CNT-V, CNT-N, CNT-P, CNT-NP and CNT-VP using the equivalent circuit in **Fig. S21**.

| Samples       | $R_s$ ( $\Omega$ ) | $R_1$ ( $\Omega$ ) | CPE1 (F)               | $R_{ct}$ ( $\Omega$ ) | CPE2 (F)              |
|---------------|--------------------|--------------------|------------------------|-----------------------|-----------------------|
| <i>CNT-V</i>  | 2.17               | 0.41               | $4.25 \times 10^{-12}$ | 65.69                 | $2.45 \times 10^{-7}$ |
| <i>CNT-N</i>  | 2.14               | 0.35               | $4.98 \times 10^{-12}$ | 60.53                 | $2.66 \times 10^{-7}$ |
| <i>CNT-P</i>  | 2.11               | 0.32               | $5.45 \times 10^{-12}$ | 52.18                 | $3.08 \times 10^{-7}$ |
| <i>CNT-NP</i> | 2.07               | 0.24               | $7.27 \times 10^{-12}$ | 34.61                 | $4.65 \times 10^{-7}$ |
| <i>CNT-VP</i> | 2.01               | 0.19               | $9.18 \times 10^{-12}$ | 21.59                 | $7.45 \times 10^{-7}$ |



**Table S7.** The detailed dosages of melamine and phosphoric acid in the synthesis of various CNT-NP catalysts.

| <b>Samples</b>  | <b>Melamine (mg)</b> | <b>Phosphoric acid (mL)</b> |
|-----------------|----------------------|-----------------------------|
| <b>CNT-NP</b>   | 60                   | 0.15                        |
| <b>CNT-NP-1</b> | 80                   | 0.10                        |
| <b>CNT-NP-2</b> | 40                   | 0.20                        |
| <b>CNT-NP-3</b> | 20                   | 0.05                        |
| <b>CNT-NP-4</b> | 40                   | 0.10                        |
| <b>CNT-NP-5</b> | 80                   | 0.20                        |
| <b>CNT-NP-6</b> | 100                  | 0.25                        |
| <b>CNT-NP-7</b> | 120                  | 0.30                        |
| <b>CNT-NP-8</b> | 140                  | 0.35                        |

**Table S8.** The detailed dosages of melamine and phosphoric acid in the synthesis of various CF-NP and G-NP, respectively.

| <b>Samples</b> | <b>Melamine (mg)</b> | <b>Phosphoric acid (mL)</b> |
|----------------|----------------------|-----------------------------|
| <b>CF-NP-1</b> | 20                   | 0.05                        |
| <b>CF-NP-2</b> | 40                   | 0.10                        |
| <b>CF-NP-3</b> | 60                   | 0.15                        |
| <b>CF-NP-4</b> | 80                   | 0.20                        |
| <b>CF-NP-5</b> | 100                  | 0.25                        |
| <b>CF-NP-6</b> | 120                  | 0.30                        |
| <b>CF-NP-7</b> | 140                  | 0.35                        |
| <b>G-NP-1</b>  | 20                   | 0.05                        |
| <b>G-NP-2</b>  | 40                   | 0.10                        |
| <b>G-NP-3</b>  | 60                   | 0.15                        |
| <b>G-NP-4</b>  | 80                   | 0.20                        |
| <b>G-NP-5</b>  | 100                  | 0.25                        |
| <b>G-NP-6</b>  | 120                  | 0.30                        |
